# Supplementary figures and images for: Natural Variation Uncovers Candidate Genes for Barley Spikelet Number and Grain Yield under Drought Stress
Source: MDPI journal article supplement (doi:10.3390/genes11050533), 2020-05-11

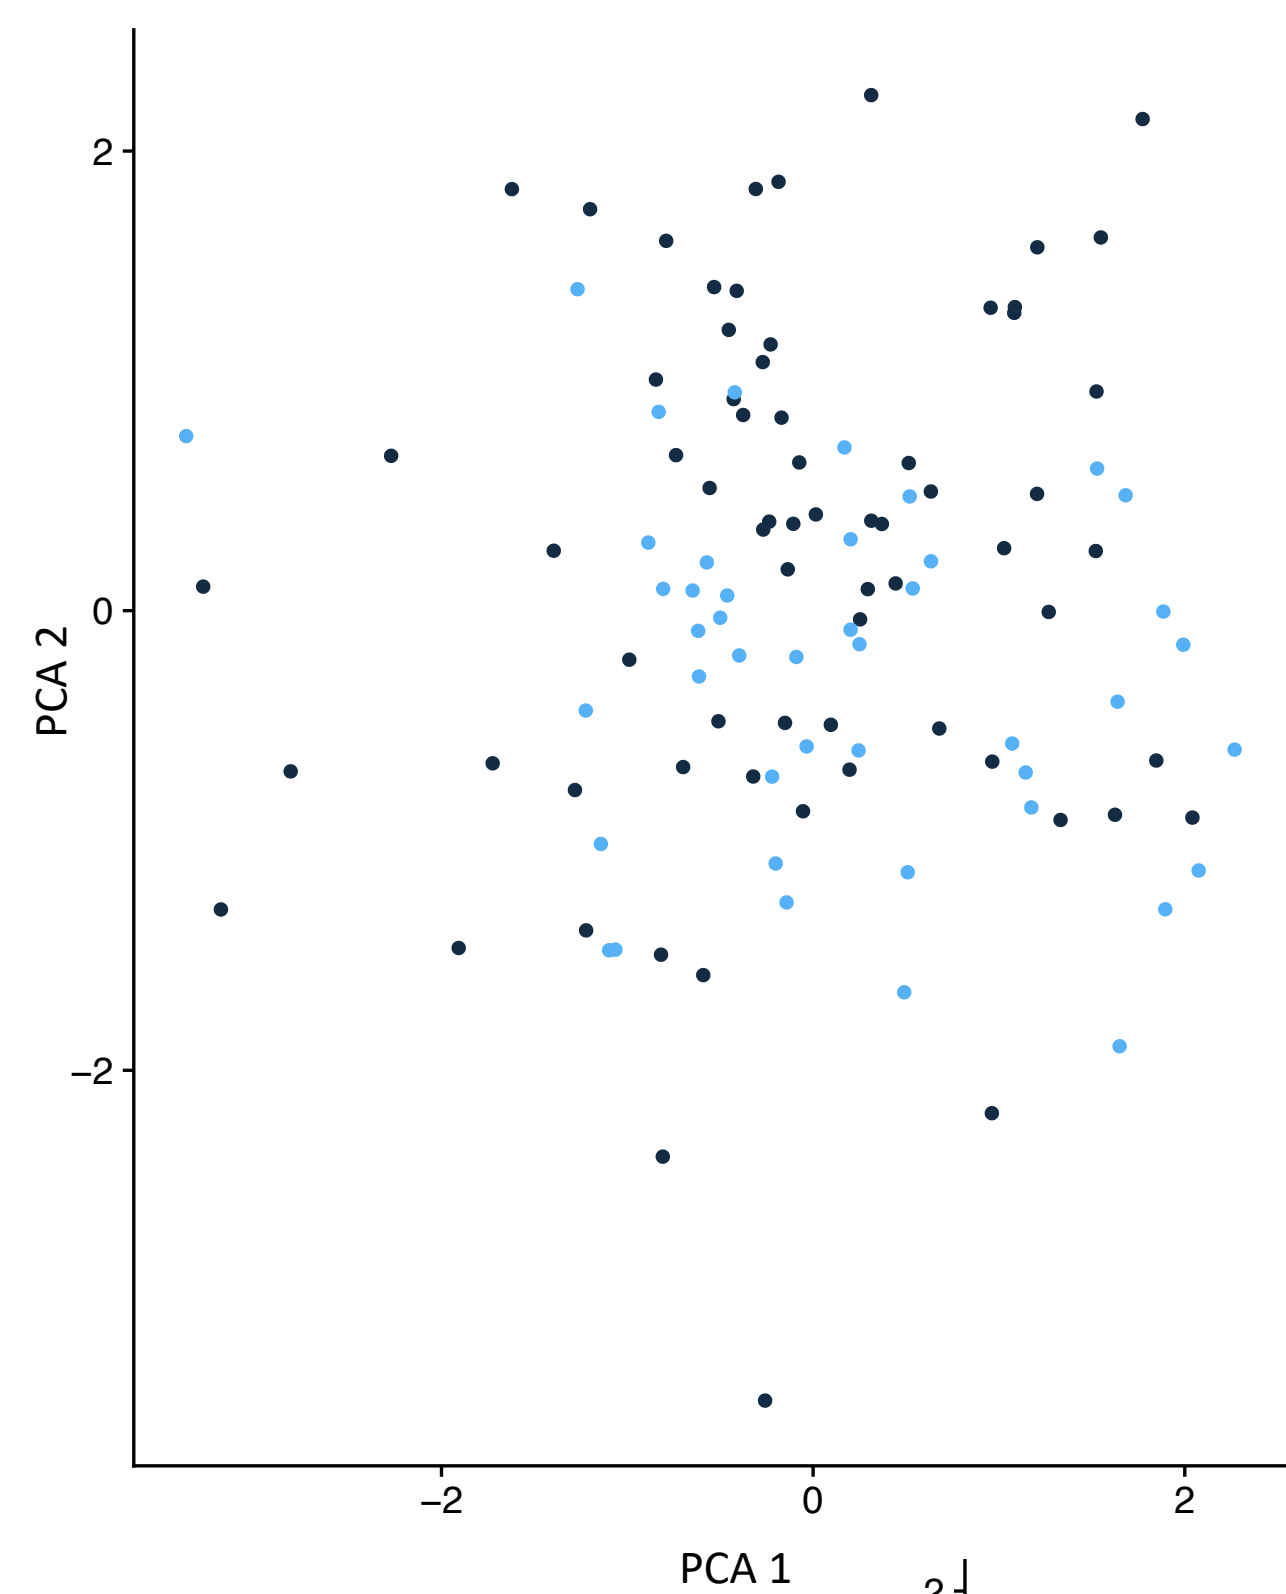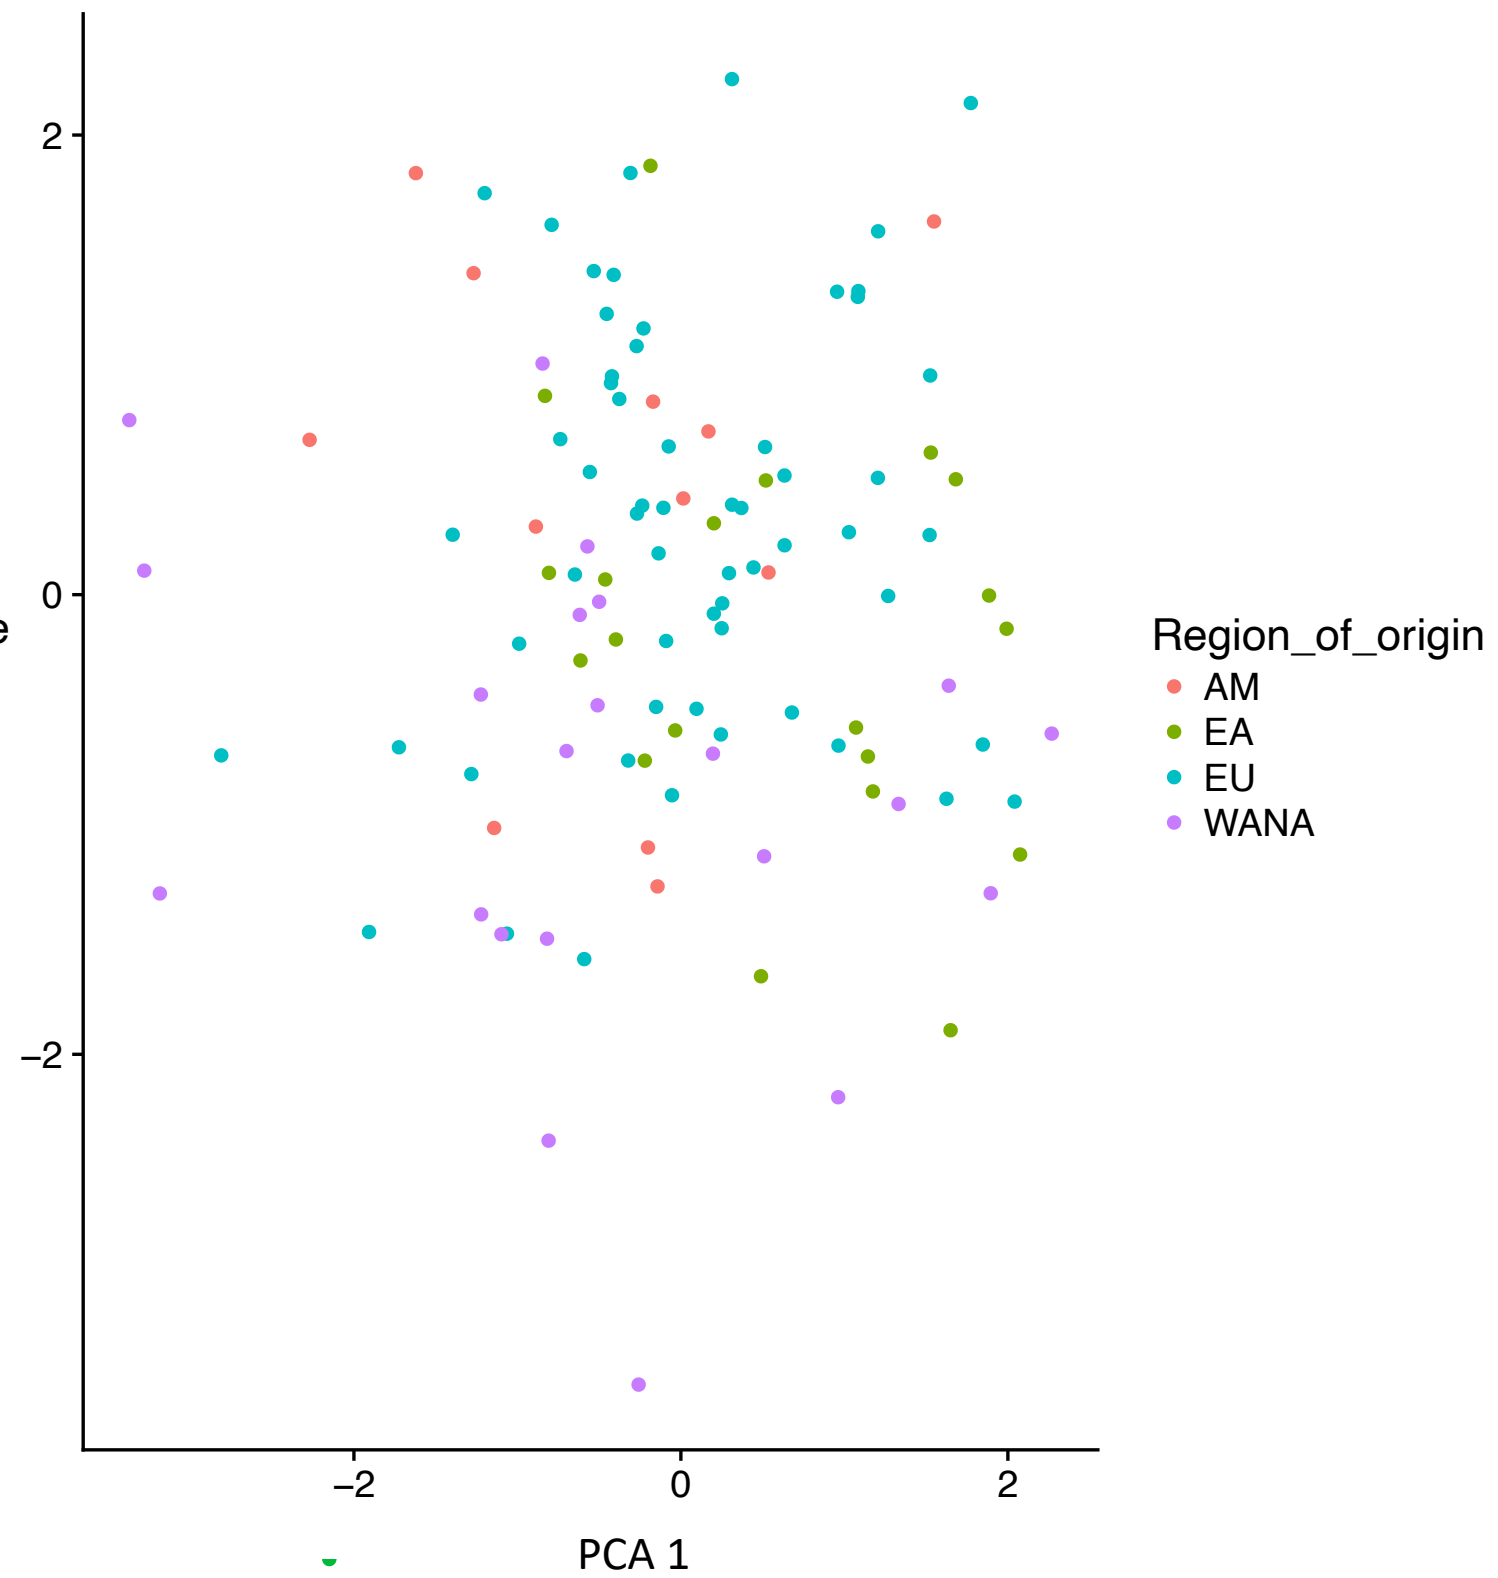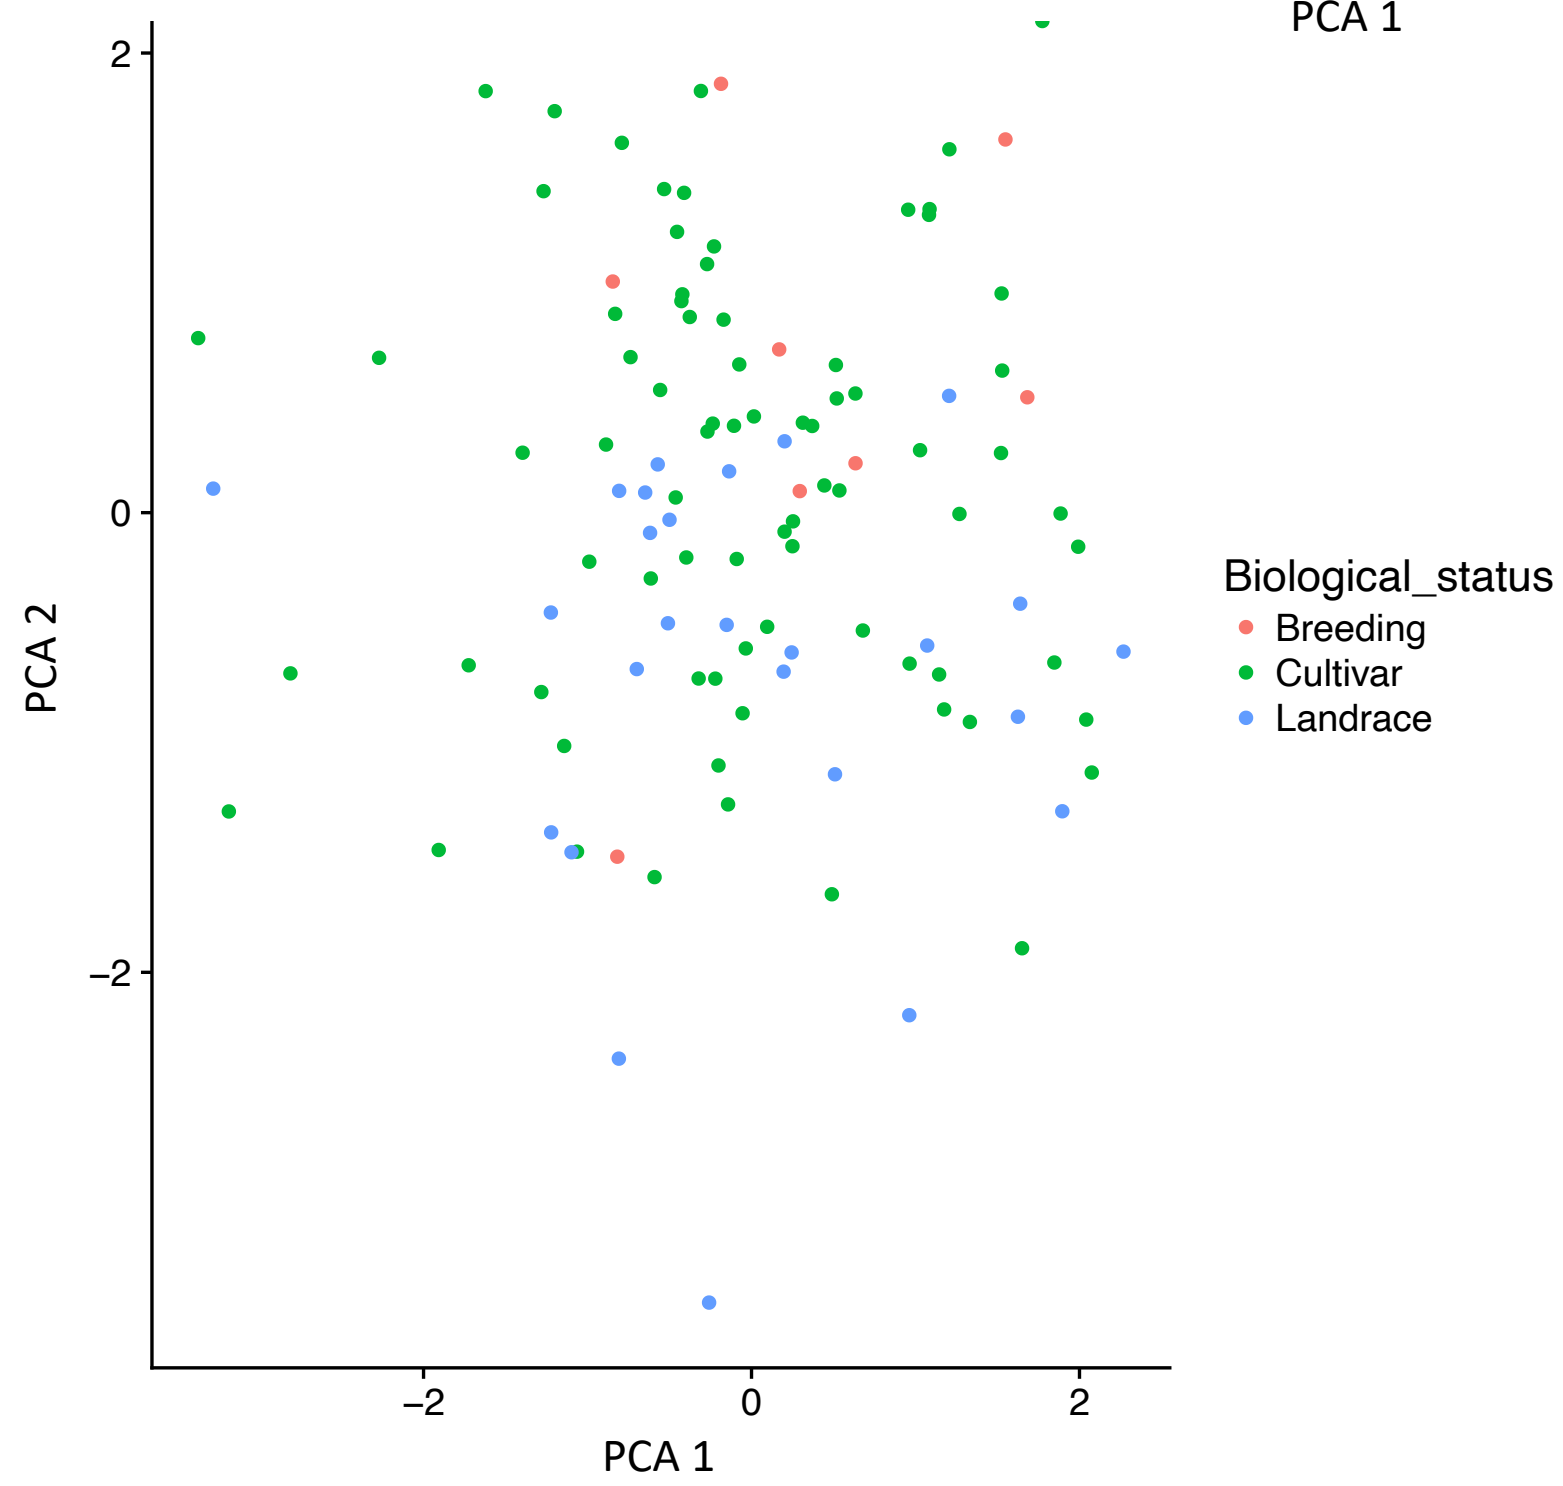

Supplement: s1 [file s1]

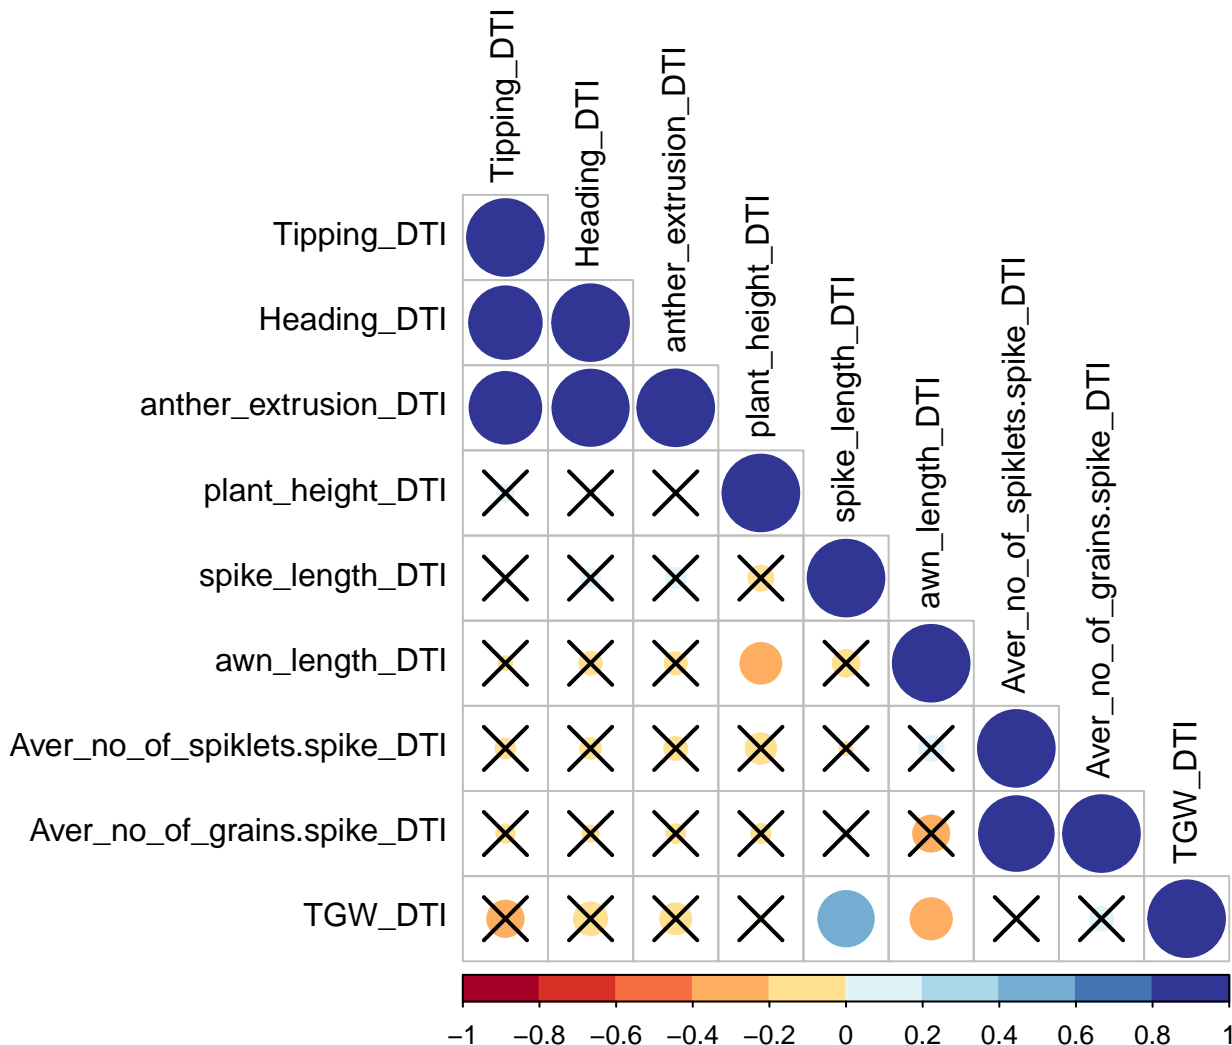

Supplement: s1 [file s1]
